# Supplementary material
Source: Springer Nature journal article supplement (https://www.springermedizin.de/resource/supplementary/12936_2014_3300_MOESM1_ESM.pdf/9545574)
Supplement: MOESM1 [file 9545574]

|                                                                             |       |         |         |                                                |                         |                         |                                                             |   |
|-----------------------------------------------------------------------------|-------|---------|---------|------------------------------------------------|-------------------------|-------------------------|-------------------------------------------------------------|---|
| Twonship, Dengzhou City, Henan Province[16]                                 | 2721  | 2007-06 | 2007-09 | An.sinensis                                    | P. vivax                | Chinese guidelines      | 34 cases                                                    | A |
| JuDong Village, Xiajiang Twon, Congjiang County Guizhou Province [12]       | 753   | 2007-07 | 2007-08 | An.sinensis<br>An.anthropophagus<br>An.minimus | P. vivax                | Chinese guidelines      | 102 cases with incidence rate 12.93%                        | A |
| Kangfu Village, Mengding Town, Gengma County, Yunnan Province [17]          | 328   | 2008-06 | 2008-07 | An.vagus<br>An.anthropophagus<br>An.minimus    | P.vivax<br>P.falciparum | Chinese guidelines      | 39 cases                                                    | A |
| Zhu Village, Motuo County Tibet Autonomous Region [18, 19]                  | 186   | 2010-06 | 2010-08 | An.maculatus                                   | P.vivax                 | Chinese guidelines      | 21 cases                                                    | A |
| <b>Type-2 County</b>                                                        |       |         |         |                                                |                         |                         |                                                             |   |
| Mingzhuang Village, Funan County, An'hui Province [20]                      | 17366 | 1991-01 | 1991-09 | An.sinensis                                    | P.vivax                 | WHO outbreak definition | Incidence 13.34%                                            | A |
| Tanghuayuan Village, Funan County, An'hui Province [20]                     | 466   | 1991-01 | 1991-09 | An. Sinensis                                   | P.vivax                 | WHO outbreak definition | Incidence 31.55%                                            | A |
| Chuanshi Twonship, Guang'an County, Sichuan Province [21]                   | 1361  | 1991-08 | 1991-09 | An.minius                                      | /‡                      | WHO outbreak definition | 61 cases                                                    | A |
| Niujiaozhai Village, Yuanyang County, Yunnan Province [22]                  | 28787 | 1991-10 | 1991-10 | An.sinensis<br>An.minius                       | P.vivax<br>P.falciparum | WHO outbreak definition | 849 cases and 6 death                                       | A |
| Napo County, Guangxi Province [23]                                          | 1109  | 1992    | 1992    | An.minimus<br>An.jeyporiensis<br>Candidiensis  | P.vivax<br>P.falciparum | WHO outbreak definition | 105 cases and 1 death [parasite positive rate 12.93/10,000] | A |
| Mining stone factory, Changliu Town, Haikou City, Hainan Province [24]      | 3600  | 1993-07 | 1993-09 | An.minimus                                     | P.vivax                 | WHO outbreak definition | 153 cases                                                   | A |
| Four villages, Jinghong City, Yunnan Province [25]                          | 1027  | 1994    | 1994    | /                                              | P.vivax<br>P.falciparum | WHO outbreak definition | 544 cases in 1994                                           | A |
| Nadayala, Zhanzhou City, Hainan Province [5]                                | 53    | 1996-08 | 1996-10 | An.minius                                      | P.falciparum            | WHO outbreak definition | Incidence rate 35.8%                                        | B |
| Xuyi County, Jiangsu Province [26]                                          | 69126 | 1997-06 | 1997-09 | An.anthropophagus<br>An.sinensis               | P.vivax                 | WHO outbreak definition | 643 cases                                                   | A |
| Er'shilihe Village, Pingqiao District,Xingyang City, Henan Province [27-31] | 678   | 1998    | 1999    | An.anthropophagus<br>An.sinensis               | P.vivax                 | WHO outbreak definition | Incidence rate 20% in 1999                                  | A |

|                                                                            |        |         |         |                                      |                         |                         |                                       |   |
|----------------------------------------------------------------------------|--------|---------|---------|--------------------------------------|-------------------------|-------------------------|---------------------------------------|---|
| Villages, Shangshui County Henan Province [32, 33]                         | 50,000 | 2001    | 2003    | An.sinensis                          | P.vivax                 | WHO outbreak definition | 1777 cases in 2001                    | A |
| Furongtian farming construction site, Hainan Province [34]                 | 286    | 2002-06 | 2002-06 | /                                    | P.vivax<br>P.falciparum | WHO outbreak definition | 52 cases                              | A |
| Fanda Viallge, Lanyang County, Zhanzhou city, Hainan Province [34]         | 389    | 2002-08 | 2002-08 | /                                    | P.vivax<br>P.falciparum | WHO outbreak definition | 44 cases                              | A |
| Three villagers, Jiande City, ZheJiang Province [35-38]                    | 42700  | 2004-08 | 2004-10 | Culex<br>An.sinensis                 | P. vivax                | WHO outbreak definition | 11 cases                              | A |
| Pingdi Village, Tengchong County, Yunnan Province [39]                     | 54     | 2008-05 | 2008-05 | An.anthropophagus<br>An.kunmingensis | P.vivax                 | Chinese guidelines      | 6 cases                               | A |
| <b>Type-3 County</b>                                                       |        |         |         |                                      |                         |                         |                                       |   |
| Kejian Village, Jian'ou County, Fujian Province [40,41]                    | 2561   | 1991-09 | 1991-10 | An.sinensis                          | P. vivax                | WHO outbreak definition | 24 cases                              | A |
| Liufang Village, Longjuan Township, An'xi County, Fujian Province [42, 43] | 380    | 1995    | 1995    | An. sinensis                         | P. vivax                | WHO outbreak definition | 38 cases                              | A |
| Pu'er County, Yunnan Province [44]                                         | 184839 | 1999    | 1999    | An. sinensis<br>An. maculatus        | P.vivax<br>P.falciparum | WHO outbreak definition | Incidence rate<br>3.89/10,000 in 1999 | A |
| Two villages, Qinshi Town Changshan County, Zhejiang Province [45]         | 3678   | 2004-10 | 2004-10 | /                                    | P. vivax                | Chinese guidelines      | 5 cases                               | A |
| Honghe Town, Jiaxing City, ZheJiang Province [46]                          | 10000  | 2005    | 2005    | An. sinensis                         | /                       | Chinese guidelines      | 4 cases                               | A |

\*A= Active outbreak investigation [quantitative and qualitative]; B= Based on retrospective data analysis;

†based on malaria country reports of the years 2006-2008 from Action Plan of China Malaria Elimination [2010-2020]. Type I: local infections detected in three consecutive years and annual incidences  $\geq 1/10,000$ ; Type II: local infections detected in three consecutive years and at least in one year the annual incidence  $< 1/10,000$  and  $> 0$ ; Type III: no local infections reported in the last three years;

‡No information available
